# Supplementary material
Source: PubMed Central journal article supplement (PMC3932062)
Supplement: NIHMS543267-supplement-Appendix_A___B.pdf [file NIHMS543267-supplement-Appendix_A___B.pdf]

Appendix A

*Correlations among Passage WCPM within Grade and Passage Set*

| Passage Set and |          | Grade 6 |     |     |     | Grade 7 |     |     |     | Grade 8 |     |     |     |  |
|-----------------|----------|---------|-----|-----|-----|---------|-----|-----|-----|---------|-----|-----|-----|--|
| Number (#)      |          |         |     |     |     |         |     |     |     |         |     |     |     |  |
| A               | #        | 1       | 6   | 11  | 16  | 6       | 11  | 16  | 21  | 11      | 16  | 21  | 26  |  |
|                 | 6        | .85     |     |     |     |         |     |     |     |         |     |     |     |  |
|                 | 11       | .88     | .91 |     |     | .90     |     |     |     |         |     |     |     |  |
|                 | 16       | .87     | .91 | .92 |     | .85     | .91 |     |     | .95     |     |     |     |  |
|                 | 21       | .87     | .89 | .91 | .92 | .85     | .94 | .92 |     | .94     | .94 |     |     |  |
|                 | 26       |         |     |     |     | .85     | .91 | .90 | .92 | .92     | .91 | .92 |     |  |
|                 | 31       |         |     |     |     |         |     |     |     | .92     | .92 | .93 | .94 |  |
|                 | <i>M</i> |         | .89 |     |     |         | .90 |     |     |         | .93 |     |     |  |
| B               | #        | 2       | 7   | 12  | 17  | 7       | 12  | 17  | 22  | 12      | 17  | 22  | 27  |  |
|                 | 7        | .88     |     |     |     |         |     |     |     |         |     |     |     |  |
|                 | 12       | .86     | .86 |     |     | .92     |     |     |     |         |     |     |     |  |
|                 | 17       | .87     | .87 | .91 |     | .91     | .92 |     |     | .91     |     |     |     |  |
|                 | 22       | .84     | .84 | .87 | .88 | .91     | .87 | .90 |     | .87     | .90 |     |     |  |
|                 | 27       |         |     |     |     | .91     | .89 | .90 | .90 | .87     | .86 | .89 |     |  |
|                 | 32       |         |     |     |     |         |     |     |     | .90     | .90 | .88 | .91 |  |
|                 | <i>M</i> |         | .87 |     |     |         | .91 |     |     |         | .89 |     |     |  |
| C               | #        | 3       | 8   | 13  | 18  | 8       | 13  | 18  | 23  | 13      | 18  | 23  | 28  |  |
|                 | 8        | .85     |     |     |     |         |     |     |     |         |     |     |     |  |
|                 | 13       | .90     | .91 |     |     | .91     |     |     |     |         |     |     |     |  |
|                 | 18       | .85     | .89 | .89 |     | .89     | .92 |     |     | .92     |     |     |     |  |
|                 | 23       | .87     | .86 | .91 | .89 | .88     | .89 | .88 |     | .92     | .91 |     |     |  |
|                 | 28       |         |     |     |     | .87     | .91 | .90 | .88 | .87     | .90 | .91 |     |  |
|                 | 33       |         |     |     |     |         |     |     |     | .87     | .90 | .90 | .92 |  |
|                 | <i>M</i> |         | .88 |     |     |         | .89 |     |     |         | .90 |     |     |  |
| D               | #        | 4       | 9   | 14  | 19  | 9       | 14  | 19  | 24  | 14      | 19  | 24  | 29  |  |
|                 | 9        | .88     |     |     |     |         |     |     |     |         |     |     |     |  |
|                 | 14       | .88     | .90 |     |     | .88     |     |     |     |         |     |     |     |  |
|                 | 19       | .86     | .89 | .91 |     | .88     | .94 |     |     | .94     |     |     |     |  |
|                 | 24       | .89     | .87 | .89 | .91 | .85     | .94 | .92 |     | .92     | .93 |     |     |  |
|                 | 29       |         |     |     |     | .87     | .93 | .92 | .93 | .91     | .93 | .92 |     |  |
|                 | 34       |         |     |     |     |         |     |     |     | .89     | .91 | .92 | .92 |  |
|                 | <i>M</i> |         | .89 |     |     |         | .91 |     |     |         | .92 |     |     |  |
| E               | #        | 5       | 10  | 15  | 20  | 10      | 15  | 20  | 25  | 15      | 20  | 25  | 30  |  |
|                 | 10       | .91     |     |     |     |         |     |     |     |         |     |     |     |  |
|                 | 15       | .91     | .92 |     |     | .83     |     |     |     |         |     |     |     |  |

|          |     |     |     |     |     |     |     |     |     |     |     |     |
|----------|-----|-----|-----|-----|-----|-----|-----|-----|-----|-----|-----|-----|
| 20       | .89 | .91 | .90 |     | .87 | .86 |     |     | .91 |     |     |     |
| 25       | .87 | .89 | .88 | .89 | .78 | .81 | .81 |     | .86 | .85 |     |     |
| 30       |     |     |     |     | .83 | .83 | .84 | .83 | .87 | .90 | .85 |     |
| 35       |     |     |     |     |     |     |     |     | .79 | .83 | .80 | .89 |
| <i>M</i> |     | .90 |     |     |     | .83 |     |     |     | .86 |     |     |

---

*Note.* Within Grade and Passage Set, the same students read all five passages, and the passages are ordered from least to highest Lexile score. Passages listed in corresponding orders across Passage Sets within Grade fall within the same Lexile band (e.g., Passages 1 -5 were the first passages read in sets A-D, respectively, within Grade 6 and all fall within Lexile Band 350-460; Passages 6-10 were the second passages read in sets A-D, respectively, within Grade 6 and all fall within Lexile Band 461-570, etc.).

Appendix B

*Covariance Model Fits and Estimates*

| Covariance Model Fits    |         |       |      |        |       |      |
|--------------------------|---------|-------|------|--------|-------|------|
| Covariance Structure     | AIC     | BIC   | SRMR | AIC    | BIC   | SRMR |
|                          | NG - NG |       |      | G - NG |       |      |
| Variance Components (VC) | 78604   | 78615 | .06  | 78606  | 78628 | .14  |
| Banded Main Diagonal     | 78153   | 78185 | .10  | 78155  | 78198 | .17  |
| Autoregressive (AR)      | 78035   | 78051 | .06  | 78038  | 78065 | .14  |
| Covariance Model Fits    |         |       |      |        |       |      |
| Covariance Structure     | AIC     | BIC   | SRMR | AIC    | BIC   | SRMR |
|                          | NG - G  |       |      | G - G  |       |      |
| Variance Components      | 78603   | 78625 | .13  | 78606  | 78638 | .15  |
| Banded Main Diagonal     | 77957   | 78045 | .15  | 77959  | 78057 | .17  |
| Autoregressive           | 77892   | 77931 | .19  | 77890  | 77939 | .15  |

| Covariance Model Estimates |       |           |                    |                   |        |       |
|----------------------------|-------|-----------|--------------------|-------------------|--------|-------|
| Covariance Structure       | Grade | Intercept | Intercept Variance | Residual Variance | $\rho$ | $R^2$ |
| NG-NG VC                   | 6,7,8 | 125.28    | 1285.50            | 269.32            |        | .83   |
| NG-NG AR                   | 6,7,8 | 125.47    | 1178.60            | 376.97            | .46    | .76   |
| NG-G AR                    | 6     | 124.78    | 1120.86            | 286.5             | .21    | .80   |
|                            | 7     |           |                    | 443.35            | .54    | .72   |
|                            | 8     |           |                    | 640.28            | .73    | .64   |
| G-G AR                     | 6     | 125.27    | 1191.63            | 285.67            | .21    | .81   |
|                            | 7     |           | 1161.4             | 437.78            | .54    | .73   |
|                            | 8     |           | 778.73             | 855.42            | .80    | .48   |

| NG NG AR Residual Covariance Estimates |        |        |        |        |        |
|----------------------------------------|--------|--------|--------|--------|--------|
| Read                                   | 1      | 2      | 3      | 4      | 5      |
| 1                                      | 376.97 |        |        |        |        |
| 2                                      | 174.39 | 376.97 |        |        |        |
| 3                                      | 80.68  | 174.39 | 376.97 |        |        |
| 4                                      | 37.32  | 80.68  | 174.39 | 376.97 |        |
| 5                                      | 17.27  | 37.32  | 80.68  | 174.39 | 376.97 |

Note. NG-NG = No grade (NG) differences in either intercept (between student) or residual (within student) variances in reading fluency; G-NG = Grade (G) differences in intercept variances but no grade (NG) differences in residual variances. The covariance structure refers to the residual covariances. The covariance structure of the intercept variance was variance components in every case. Variance components models assume a single residual variance (for each of the five reads in this case) and covariances between residuals = 0. The autoregressive

model assumes a single residual variance estimate as well as a single multiplicative factor ( $\rho$ ). Residual covariances are a function of the variance and  $\rho$  estimates as well as the distance between reads (e.g., adjacent residuals such as the residuals for reads 1 and 2, reads 2 and 3, etc. are assumed to have the same covariance which is higher than non-adjacent residuals such as those for reads 1 and 3, reads 2 and 4, etc.).  $R^2$  represents the proportion of variance due to the intercept, i.e., the proportion of variances due to differences between students versus differences within students.
